# Supplementary material for: Optical spin readout of a silicon color center in the telecom L-band
Source: Research Square preprint supplement (doi:10.21203/rs.3.rs-6031453/v1), 2025-03-31
Supplement: Supplementary file 1 [file b017bbcc07d9a68889aa5610.docx]

**Supplementary Information**

**Optical spin readout of a silicon color center in the telecom L-band**

Shuyu Wen,1,2,3 Gregor Pieplow,4 Junchun Yang,1,5 Kambiz Jamshidi,5 Manfred Helm,1,5 Jun-Wei Luo,2,3 Tim Schröder,4 Shengqiang Zhou,1* & Yonder Berencén1**

*1Helmholtz-Zentrum Dresden-Rossendorf, Institute of Ion Beam Physics and Materials Research, Bautzner Landstrasse 400, 01328 Dresden, Germany*

*2State Key Laboratory of Superlattices and Microstructures, Institute of Semiconductors, Chinese Academy of Sciences, Beijing 100083, China*

*3Center of Materials Science and Optoelectronics Engineering, University of Chinese Academy of Sciences, Beijing 100049, China*

*4Humboldt-Universität zu Berlin, Department of Physics, 12489 Berlin, Germany*

*5Technische Universität Dresden, 01062 Dresden, Germany*

Corresponding authors: [s.zhou@hzdr.de*](mailto:s.zhou@hzdr.de*)[y.berencen@hzdr.de](mailto:y.berencen@hzdr.de)**


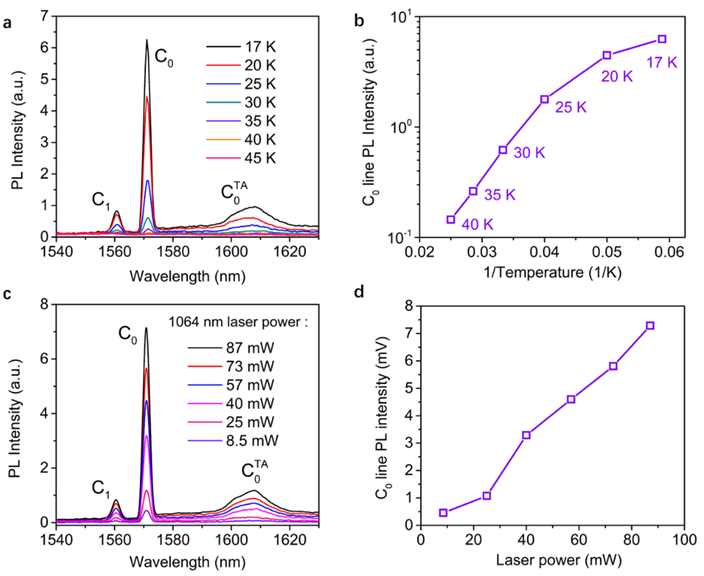


**Supplementary Figure S1 | Temperature and excitation power dependence of the photoluminescence (PL) spectra of an ensemble of C centers in silicon.** **a**, Temperature-dependent PL measurement of the C center emission line under 57 mW of 1064 nm laser excitation. The PL signal from the C center is fully quenched above 45 K. **b**, Near-linear relationship between 1/temperature and the PL intensity of the C0 line. **c**, Laser power-dependent PL measurement at 20 K. **d**, Near-linear relationship between the excitation laser power and the PL intensity of the C0 line.


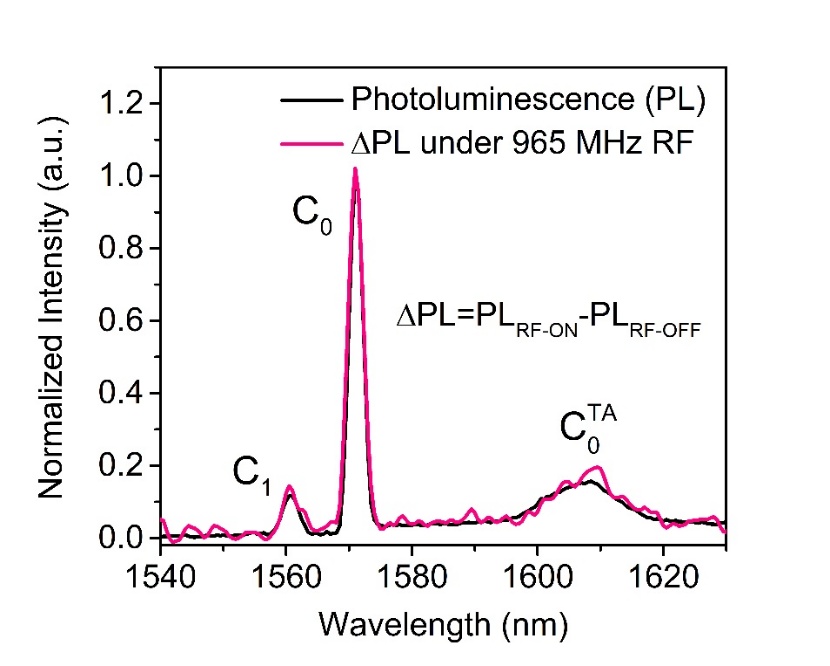


**Supplementary Figure S2 | Line shape comparison between PL and RF-modulated PL of the C center in silicon.** Comparison of the photoluminescence (PL) spectrum (black) and the differential PL signal ΔPL = PLRF-ON - PLRF-OFF (magenta) under 965 MHz RF excitation and 1064 nm laser excitation. Both the C₀ and C₁ emission lines exhibit optically detected magnetic resonance (ODMR).
